RESEARCH ARTICLE

# Social-Economic Status and Cognitive Performance among Chinese Aged 50 Years and Older

Fan Wu<sup>1,2,3</sup>, Yanfei Guo<sup>2,3</sup>, Yang Zheng<sup>2,3</sup>, Wenjun Ma<sup>6</sup>, Paul Kowal<sup>4,5</sup>, Somnath Chatterji<sup>4</sup>, Ling Wang<sup>1\*</sup>

**1** School of Public Health, Fudan University, Shanghai, China, **2** Shanghai Institute of Preventive Medicine, Shanghai, China, **3** Shanghai Municipal Center for Disease Control & Prevention, Shanghai, China, **4** World Health Organization, Department of Health and Information Systems, Geneva, Switzerland, **5** University of Newcastle Research Centre for Generational, Health and Ageing, Newcastle, Australia, **6** Guangdong Provincial Institute of Public Health, Guangdong Provincial Center for Disease Control and Prevention, Guangzhou, China

\* [lingwang@fudan.edu.cn](mailto:lingwang@fudan.edu.cn)

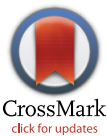

OPEN ACCESS

**Citation:** Wu F, Guo Y, Zheng Y, Ma W, Kowal P, Chatterji S, et al. (2016) Social-Economic Status and Cognitive Performance among Chinese Aged 50 Years and Older. PLoS ONE 11(11): e0166986. doi:10.1371/journal.pone.0166986

**Editor:** Chen-Wei Pan, Soochow University Medical College, CHINA

**Received:** June 15, 2016

**Accepted:** November 7, 2016

**Published:** November 18, 2016

**Copyright:** © 2016 Wu et al. This is an open access article distributed under the terms of the [Creative Commons Attribution License](https://creativecommons.org/licenses/by/4.0/), which permits unrestricted use, distribution, and reproduction in any medium, provided the original author and source are credited.

**Data Availability Statement:** All relevant data are within the paper and its Supporting Information files.

**Funding:** This study was funded by the US National Institute on Aging through Interagency Agreements (OGHA 04034785; YA1323-08-CN-0020; Y1-AG-1005-01) and through a research grant (R01-AG034479); Science and Technology Commission of Shanghai Municipality (Grant No. 10XD1403600); Health and Family Planning Commission of Shanghai Municipality (Grant No. GWIV-22). The funders had no role in study

## Abstract

### Background

Numerous population-based studies have suggested that socio-economic status (SES) is associated with cognitive performance, but few nationally representative epidemiological studies on cognitive performance with a large sample of older adults are available in China. And many studies explore the factors associated with cognitive performance, mainly focusing on individual level and more rarely on multiple levels that include the individual and community.

### Methods

This study uses SAGE-China Wave 1 data which consisted of 13,157 adults aged 50 years and older to explore socioeconomic inequalities in the cognitive performance from a multi-level perspective (individual and community levels). The overall cognition score was based on the seven separate components of the cognition tests, including the four verbal recall trials, the verbal fluency test, the forward digit span test and the backward digit span test. Factor analysis was applied to evaluate and generate a single overall score. A two-level hierarchical linear model was used to evaluate the association between SES at these two levels and the overall cognition score adjusted for age, sex and marital status.

### Results

At individual level, years of education was significantly associated with overall cognition score for both urban and rural dwellers. At the community level, a positive association was obtained between median household income and median years of education and overall cognition score among urban participants.

design, data collection and analysis, decision to publish, or preparation of the manuscript.

**Competing Interests:** The authors have declared that no competing interests exist.

**Abbreviations:** **SAGE**, Study on Global AGEing and Adult Health; **SES**, socio-economic status; **PSU**, principle sample units; **SSU**, secondary sample units; **TSU**, tertiary sample units.

## Conclusion

A significant association between SES at both individual-level and community-level (only for urban area) and cognitive performance were found in this study of a national sample of 13,157 Chinese aged 50 years and older, even after adjusting for demographic characteristics. Identifying community-based SES variables that are associated with cognitive performance in the older population provides further evidence for the need to address community characteristics associated with deprivation.

## Background

Cognitive function refers to those mental processes that are crucial for the conduct of activities of daily living. Such mental processes include attention, memory, reasoning, coordination of movement and planning of tasks[1]. A number of components of cognitive function typically decline with ageing. Cognitive impairment, including dementia as one outcome of decline, may increase considerably with the rapidly growing population of older adults. It is a major health and social problem worldwide, including China, affecting loss of independence in daily activities and lowers the quality of life in older age[2, 3].

A number of population-based studies have suggested that socio-demographic characteristics is associated with cognitive performance, with increasing age, female sex and lower education consistently associated with lower cognitive performance [4, 5]. Cognitive decline is also associated with poor financial status [6, 7]. Socioeconomic inequalities have also been shown to contribute to discrepancies in cognition.

Compared with higher income countries, few nationally representative epidemiological studies on cognitive performance with a large sample of older adults are available in China. On the other hand, many studies explore the factors associated with cognitive performance, mainly focusing on individual level and more rarely on multiple levels that include the individual and community. One study among community-dwelling older adults in Singapore showed that neighborhood socioeconomic status is related to cognitive performance [7]. Living in a low-SES community is independently associated with cognitive impairment in an urban Asian society. Another study conducted in older US women supported the view that the socioeconomic status of a woman's neighborhood is associated with cognitive performance [8]. These studies point to additional factors, community effects, which should be drawn into any investigation of cognition.

The Study on global AGEing and adult health (SAGE) China Wave 1 is the baseline of a longitudinal population-based survey designed to provide high quality health and well-being data on the adult population and ageing process in China. To our knowledge, this was the first nationwide population-based older adults' health and well-being survey in China. This study uses SAGE-China Wave 1 data to examine whether socioeconomic status is related to cognitive test performance from a multilevel perspective (individual and community levels). In addition, we assessed how much of the variation in cognitive test performance was explained by socioeconomic variables.

## Method

### Study population and survey design

The WHO Study on global AGEing and adult health (SAGE) aims to understand the Impact of aging on health and well-being in China and five other countries including Ghana, India,

Mexico, Russia and South Africa. SAGE-China involves a nationally representative sample of adults aged 50 years and older, their spouses, and other persons aged 50 years and older in the household ( $n = 8,000$ ). A probability sampling design and a five-stage cluster sampling strategy were used. First, eight provinces/municipality were selected from a total of 31 provinces/municipalities in China, according to its geographic area and social economic level. Second, one rural county and one urban district in each province/municipality were selected. In total, eight provinces and 16 strata (county/district) were selected for SAGE-China. The study sample covered a total of 64 principle sample units (PSU) (four urban and four rural township/community from each county/district), 128 secondary sample units (SSU) (two villages/EAs per township/community) and 256 tertiary sample units (TSU) (two residential blocks per villages/EAs). Wave 1 was successfully completed in 2010, and consists of 10,218 “50 years and older” households and 13,177 individual respondents aged 50 years and older. The details were specified in the appendix [S1 Appendix](#).

## Ethics and consent

WHO’s Ethical Review Committee approved SAGE (RPC146), with local approval by the ethics review committee of the Chinese Center for Disease Control and Prevention (approval notice 200601). Written informed consent was obtained from each respondent.

## Outcome measures

In this study, The following tests are taken to measure cognitive performance: verbal recall (immediate and delayed), verbal fluency and digit span.

**Verbal recall.** The immediate and delayed verbal recall test were administered to assess learning capacity, memory storage and memory retrieval. In the test, the interviewer read a list of words, then the respondents were given one minute to repeat as many words as possible. This test was repeated three times. After about 10 minutes, the respondent was asked to again recall the words. Each word the respondent recalls correctly as well as any substituted words was recorded as one point.

**Verbal fluency.** The respondents were given one minute to tell the names of as many animals (including birds, insects and fish) that they can think of. One point was scored for each correctly named animal.

**Digit span.** Digit span test was administered to assess concentration, attention and immediate memory. The respondents were asked to repeat a string of numbers in a forward and backward order, respectively. The number of the longest series repeated without error were recorded as the total score.

**Overall cognition score.** An overall cognition score was created to represent respondents’ overall cognition status. The overall cognition score was based on the seven separate components of the cognition tests, including the four verbal recall trials, the verbal fluency test, the forward digit span test and the backward digit span test. Factor analysis was applied to evaluate and generate a single overall score. Higher scores reflected better cognitive performance.

**Other covariates.** Other variables used in the analyses included age, gender, marital status.

## Statistical method

A two-level hierarchical linear model was used to evaluate the association between SES at two levels (individual and community) and the overall cognition score. We chose the secondary sampling unit (SSU) level to represent the community level in our model, as no direct variable on community level SES was collected. We use weighted median years of education and median household income calculated in each SSU to represent the SES of these communities.

The equations at level-1, and 2 in our multivariate models are shown as below:

Level-1:

$$Y_{jk} = \alpha_0j + \alpha_1X_{jk} + e_{jk} \quad (1)$$

Where  $Y_{jk}$  is the outcome measure for subject  $k$  in community  $j$  ( $j = 1, \dots, 127$ ),  $X_{jk}$  is the individual level risk factors  $X_{jk}$ , and  $e_{jk}$  is the error term following i.i.d. normal distribution  $N(0, \epsilon^2)$ .

Level-2:

$$\alpha_0j = \beta_00 + \beta_01Z_j + \epsilon_j \quad (2)$$

Where  $Z_j$  is the SSU community level risk factors, and  $\epsilon_j$  is the random effects capturing the unexplained deviation of community  $j$  from the average level of all communities, which follows i.i.d. normal distribution  $N(0, \epsilon^2)$ .

Covariates of interest at the individual level (level-1) include age, gender, marital status, years of education and household monthly income. we also included numbers of people in household to adjust for the effect of household size. Covariates of interest at the community level (level-2) include SSU-specific median years of education and median household income calculated. All models are stratified by residence (urban/rural). All analyses were performed using STATA v13.0.

## Result

The sample demographic characteristics are shown in [Table 1](#). The proportion of women (53.1%) was higher than men (46.9%) in the study, with small sex differences by age groups and residence. The majority of the respondents were between 50 to 59 years old (43.3%); nearly half of all respondents (51.2%) lived in a rural area. The median education levels by residence are 7.5 years in urban and 2.7 years in rural areas. Fifty-seven percent had completed primary school or beyond. People who never received formal education accounted for 25.6% of respondents, while university graduates or higher accounted for 4.6%. The overall level of education for women was lower than that of men; over half of women in rural areas had no formal education, which was more than double the level for men in rural areas and women in urban areas. As household income quintile increased from low to high, the proportion of households steadily increased among urban but decreased in rural area.

The model coefficients for each of the variables in relation to overall cognitive score are shown in [Table 2](#). An intercept only model is performed as Model 0. For urban, the Intraclass Correlation  $IC_{community} = 0.1207$  indicating that 12.07% of the variance in overall cognition score could be explained by living in different communities. Model 1 added individual level demographic characteristics and household income. The results from multilevel model show that age, gender (only among rural participants) and marital status, as control variables, were all significantly related to overall cognition score. Model 2 added community level factors on the basis of Model 1. leading to an improvement in the BIC score. For all 2 models, at individual level, "years of education" was significantly associated with overall cognition score for both urban and rural areas (Model 1, 2). At the community level, a positive association was obtained between median household income, median years of education and overall cognition score in both urban and rural areas. (Model 2) however, for rural, the bigger BIC score of model 2 revealed that adding community level variables failed to improve the fit of the model.

**Table 1. Demographic Characteristics at Individual, Household and Community Level.**

|                         | Characteristics                                | Urban           |             | Rural        |             |
|-------------------------|------------------------------------------------|-----------------|-------------|--------------|-------------|
|                         |                                                | Women           | Men         | Women        | Men         |
| <b>Individual Level</b> | <b>Age group (n (%))</b>                       |                 |             |              |             |
|                         | 50–59                                          | 1464 (40.9)     | 1062 (37.4) | 1598 (46.8)  | 1571 (47.3) |
|                         | 60–69                                          | 1036 (29.0)     | 837 (29.4)  | 1016 (29.8)  | 1030 (31.0) |
|                         | 70–79                                          | 860 (24.0)      | 753 (26.5)  | 591 (17.3)   | 566 (17.0)  |
|                         | 80+                                            | 216 (6.0)       | 191 (6.7)   | 209 (6.2)    | 157 (4.7)   |
|                         | <b>Education</b>                               |                 |             |              |             |
|                         | In years (mean (SD))                           | 6.7 (4.6)       | 8.8 (4.2)   | 2.3(3.0)     | 4.6(3.4)    |
|                         |                                                | n = 3557        | n = 2827    | n = 3393     | n = 3292    |
|                         | No formal education (n (%))                    | 711 (19.9)      | 191 (6.7)   | 1740 (50.9)  | 707 (21.3)  |
|                         | Less than primary (n (%))                      | 406 (11.3)      | 209 (7.3)   | 835 (24.4)   | 898 (27.0)  |
|                         | Primary school completed (n (%))               | 628 (17.5)      | 498 (17.5)  | 529 (15.4)   | 937 (28.2)  |
|                         | Secondary school completed (n (%))             | 938 (26.2)      | 828 (29.1)  | 257 (7.5)    | 586 (17.6)  |
|                         | High school completed (n (%))                  | 704 (19.7)      | 723 (25.4)  | 60 (1.8)     | 193 (5.8)   |
|                         | College completed or higher (n (%))            | 195 (5.4)       | 397 (14.0)  | 1 (0.03)     | 4 (0.1)     |
|                         | <b>Number of people in Household mean (SD)</b> | 2.69 (1.32)     |             | 2.63 (1.33)  |             |
|                         |                                                | n = 4247        |             | n = 4338     |             |
|                         | <b>Income quintile (n (%))</b>                 |                 |             |              |             |
| Lowest (<417)           | 215 (5.2)                                      |                 | 1509 (37.7) |              |             |
| Second (417–999)        | 512 (12.3)                                     |                 | 1035 (25.9) |              |             |
| Middle (999–1987)       | 936 (22.6)                                     |                 | 801 (20.0)  |              |             |
| Fourth (1987–3596)      | 1245 (30.0)                                    |                 | 407 (10.2)  |              |             |
| Highest (> 3596)        | 1240 (29.9)                                    |                 | 251 (6.3)   |              |             |
| <b>Community Level</b>  | <b>Median income mean(SD)</b>                  | 2491.4 (1191.5) |             | 903.7(667.0) |             |
|                         |                                                | n = 63          |             | n = 64       |             |
|                         | <b>Median education in year mean(SD)</b>       | 7.5 (2.1)       |             | 2.7 (1.4)    |             |
|                         | n = 63                                         |                 | n = 64      |              |             |

doi:10.1371/journal.pone.0166986.t001

## Discussion

Significant associations between SES in both individual-level and community-level (only among urban participants) and cognitive performance were found in this study of a national sample of 13,157 Chinese aged 50 years and older, the largest China-based study to examine the cross-sectional relationship on this issue. The association was robust, remaining significant even after adjusting for demographic characteristics.

This study confirmed evidence from previous studies [9–14] that higher individual-level education is associated with higher cognitive performance. A comparable study among the Chinese population in Taiwan, also found low education was associated with a higher risk of cognitive impairment [15]. Two possible mechanisms may explain the relationship between educational attainment and cognitive function: first, those well educated people presumably have a larger brain reserve capacity than people with less schooling, which is the ‘brain reserve capacity’ hypothesis [16]. Well educated people have an advantage over the people with less schooling in searching for mental stimulation, which may lead to beneficial change of structure and function in the brain [17]. Alternately, education may mediate one’s behavior to some extent, and could enhance general health, especially cognitive functioning[18]. For example, people with higher education might adopt healthier lifestyles that are associated with good cognitive ability.

**Table 2. Multilevel analysis of Overall Cognition Score and related factors.**

|                                                         | Urban                 |                       |                       | Rural                 |                       |                       |
|---------------------------------------------------------|-----------------------|-----------------------|-----------------------|-----------------------|-----------------------|-----------------------|
|                                                         | Model 0               | Model 1               | Model 2               | Model 0               | Model 1               | Model 2               |
|                                                         | β(standard deviation) | β(standard deviation) | β(standard deviation) | β(standard deviation) | β(standard deviation) | β(standard deviation) |
| <b>Fixed Effect</b>                                     |                       |                       |                       |                       |                       |                       |
| Intercept                                               | 0.18(0.04)***         | 0.25(0.05)***         | -0.02(0.05)           | -0.17(0.03)***        | -0.21(0.04)***        | 0.04(0.08)            |
| age                                                     |                       | -0.32(0.01)***        | -0.32(0.01)***        |                       | -0.31(0.01)***        | -0.31(0.01)***        |
| Gender                                                  |                       |                       |                       |                       |                       |                       |
| Female vs. Male                                         |                       | -0.002(0.02)          | -0.002(0.02)          |                       | -0.03(0.02)           | -0.02(0.02)           |
| Marital status                                          |                       |                       |                       |                       |                       |                       |
| Never married/Separated/Widowed vs. Married/ Cohabiting |                       | -0.08(0.03)**         | -0.09(0.03)**         |                       | -0.18(0.03)***        | -0.18(0.03)***        |
| Years of education(centered)                            |                       | 0.20(0.01)***         | 0.20(0.01)***         |                       | 0.27(0.01)***         | 0.27(0.01)***         |
| Household size                                          |                       | -0.01(0.01)           | -0.01(0.01)           |                       | 0.004(0.01)           | 0.002(0.01)           |
| Household income(Per 1000RMB)                           |                       | 0.002(0.01)           | 0.002(0.01)           |                       | -0.04(0.03)           | -0.04(0.03)           |
| Median household income (community, Per1000RMB)         |                       |                       | 0.10(0.05)*           |                       |                       | 0.21(0.07)**          |
| Median years of education (community)                   |                       |                       | 0.26(0.06)***         |                       |                       | 0.15(0.07)*           |
| <b>Random Effects</b>                                   |                       |                       |                       |                       |                       |                       |
| Variance (community level)                              | 0.1207(0.0232)        | 0.1353(0.0255)        | 0.0702(0.0139)        | 0.0655(0.0132)        | 0.077(0.0148)         | 0.0616(0.0121)        |
| Variance (Residual)                                     | 0.8475(0.0156)        | 0.652(0.012)          | 0.652(0.012)          | 0.9088(0.016)         | 0.6955(0.0123)        | 0.6952(0.0123)        |
| BIC                                                     | 15,886.92             | 14,608.68             | 14,587.73             | 17,975.29             | 16,294.50             | 16,314.02             |
| N                                                       | 5,956                 | 5,950                 | 5,950                 | 6,496                 | 6,495                 | 6,495                 |

\*P<0.05,  
 \*\*P<0.01,  
 \*\*\*P<0.001.

doi:10.1371/journal.pone.0166986.t002

Although numerous studies have established a clear link between educational attainment and cognitive functioning at individual-level, only a few known studies are available in China that have investigated this association at community-level. A strong association between community level education and cognitive performance were found among urban participants even after adjusting for demographic characteristics in this study. (Although results of our study show that SES at community level is statistically significantly associated to cognitive performance for both urban and rural, this effects in rural area were not supported by BIC score, it's likely that the significant effects were resulted from large sample size of our study.) Higher neighborhood socioeconomic deprivation was found to be related to lower cognitive functioning in one cross-sectional study [19], which is consistent with our findings. A study among community-dwelling older adults in Singapore also showed that neighborhood deprivation in urban areas is associated with cognitive function in older adults independent of the effects of individual and household socioeconomic factors[20]. One possible theory is that persons living in areas with generally low average education levels are possibly more likely to be exposed to the poor living conditions that may create hazards such as unemployment and low income, which thought to be always connected with physical and social resources scarcity, and furthermore affect engagement in both the physical and social activities that have been related to better cognitive functioning[21–23].

Our study revealed that financial condition, based on household income (particularly among urban participants) and community-level median household income, was associated

with cognitive performance in urban area. Many previous studies in China and other countries have found that poor financial status was associated with worse cognitive function at the individual level [6, 24, 25]. In this study, this association was also found at community-level. A study focusing on socioeconomic status and cognitive function among community-dwelling older adults in Singapore showed that living in a low-SES community is independently associated with cognitive impairment[7]. This may be explained by the differences in distribution of public cultural facilities such as museums, bookstores, libraries, etc. which is also considered to have stimulating effect on the cognitive function maintenance and improvement [26, 27].

The strengths of our study are the sample size, the fact that the data were derived from a large, national probability sample of older adults and the use of a measure of cognition based on assessment of several cognitive domains. There are also limitations to acknowledge. First, the relationship between education attainment and cognition is much more complicated than we imagined, some experts suggested that education is causal [28], although other scholars believed education is an outcome of intelligence[29]. This study can only state association, but cannot infer causality, in part because of the cross-sectional data used in this study SAGE Wave1, but also because it would be difficult to obtain data about cognitive ability prior to participants' education, As such, we are unable to control for reverse causation because higher pre-existing cognitive ability might be the cause of both educational attainment and higher later-life cognitive ability.[30] the second and third waves of SAGE will may provide an opportunity to examine the direction and strengths of causal influences. Second, our results may be somewhat biased toward a cognitively well-functioning population, not only because it is a community-dwelling sample, but also because this analysis did not include the proxy-assisted interviews.

China's population structure is changing rapidly, concurrent with expanding economic and social development inequality among different regions, which may be associated with cognitive functioning of older Chinese adults. Hence, understanding the role of socio-economic factors in determining health in older adults is essential in allocating resources appropriately. Identifying community-based SES variables that are associated with cognitive performance in the older population provides further evidence for the need to address community characteristics associated with deprivation. Future research should consider examining the longitudinal relationship between living in a lower SES neighborhood and risks for steeper cognitive declines, controlling for as many potential confounding factors at individual level as possible.

## Supporting Information

**S1 Appendix. Sampling and Weights.**  
(PDF)

**S1 Dataset. Dataset.**  
(DTA)

## Acknowledgments

The authors wish to express their appreciation to all involved provincial and local centers for disease control and prevention (CDC), and the more than 160 field interviewers for their support and hard work.

## Author Contributions

**Conceptualization:** FW LW.

**Data curation:** YFG.

**Formal analysis:** FW YFG.

**Funding acquisition:** SC.

**Investigation:** FW YFG YZ WJM PK SC.

**Methodology:** FW YFG YZ.

**Project administration:** FW LW.

**Resources:** PK SC.

**Software:** YFG YZ.

**Supervision:** FW LW.

**Validation:** FW YFG.

**Visualization:** YFG.

**Writing – original draft:** FW.

**Writing – review & editing:** YFG WJM PK SC LW.

## References

1. de Champlain J, Wu R, Girouard H, Karas M, A ELM, Laplante MA, et al. Oxidative stress in hypertension. *Clinical and experimental hypertension*. 2004; 26(7–8):593–601. PMID: [15702613](#).
2. Singh-Manoux A, Kivimaki M, Glymour MM, Elbaz A, Berr C, Ebmeier KP, et al. Timing of onset of cognitive decline: results from Whitehall II prospective cohort study. *Bmj*. 2012; 344:d7622. doi: [10.1136/bmj.d7622](#) PMID: [22223828](#); PubMed Central PMCID: [PMC3281313](#).
3. Yao YH, Xu RF, Tang HD, Jiang GX, Wang Y, Wang G, et al. Cognitive impairment and associated factors among the elderly in the Shanghai suburb: findings from a low-education population. *Neuroepidemiology*. 2010; 34(4):245–52. doi: [10.1159/000297751](#) PMID: [20299806](#).
4. Paul C, Ribeiro O, Santos P. Cognitive impairment in old people living in the community. *Archives of gerontology and geriatrics*. 2010; 51(2):121–4. doi: [10.1016/j.archger.2009.09.037](#) PMID: [19819569](#).
5. Millan-Calenti JC, Tubio J, Pita-Fernandez S, Gonzalez-Abraldes I, Lorenzo T, Maseda A. Prevalence of cognitive impairment: effects of level of education, age, sex and associated factors. *Dementia and geriatric cognitive disorders*. 2009; 28(5):455–60. doi: [10.1159/000257086](#) PMID: [19907183](#).
6. Xu X, Liang J, Bennett JM, Botoseneanu A, Allore HG. Socioeconomic Stratification and Multidimensional Health Trajectories: Evidence of Convergence in Later Old Age. *The journals of gerontology Series B, Psychological sciences and social sciences*. 2014. doi: [10.1093/geronb/gbu095](#) PMID: [25161216](#).
7. Wee LE, Yeo WX, Yang GR, Hannan N, Lim K, Chua C, et al. Individual and Area Level Socioeconomic Status and Its Association with Cognitive Function and Cognitive Impairment (Low MMSE) among Community-Dwelling Elderly in Singapore. *Dementia and geriatric cognitive disorders extra*. 2012; 2(1):529–42. doi: [10.1159/000345036](#) PMID: [23277785](#); PubMed Central PMCID: [PMC3522450](#).
8. Shih RA, Ghosh-Dastidar B, Margolis KL, Slaughter ME, Jewell A, Bird CE, et al. Neighborhood socioeconomic status and cognitive function in women. *American journal of public health*. 2011; 101(9):1721–8. doi: [10.2105/AJPH.2011.300169](#) PMID: [21778482](#); PubMed Central PMCID: [PMC3154213](#).
9. Christensen H, Korten AE, Jorm AF, Henderson AS, Jacomb PA, Rodgers B, et al. Education and decline in cognitive performance: compensatory but not protective. *International journal of geriatric psychiatry*. 1997; 12(3):323–30. PMID: [9152716](#).
10. Hamid TA, Krishnaswamy S, Abdullah SS, Momtaz YA. Sociodemographic risk factors and correlates of dementia in older Malaysians. *Dementia and geriatric cognitive disorders*. 2010; 30(6):533–9. doi: [10.1159/000321672](#) PMID: [21252548](#).
11. Wilson RS, Hebert LE, Scherr PA, Barnes LL, Mendes de Leon CF, Evans DA. Educational attainment and cognitive decline in old age. *Neurology*. 2009; 72(5):460–5. doi: [10.1212/01.wnl.0000341782.71418.6c](#) PMID: [19188578](#); PubMed Central PMCID: [PMC2677531](#).



12. Peters R, Beckett N, Geneva M, Tzekova M, Lu FH, Poulter R, et al. Sociodemographic and lifestyle risk factors for incident dementia and cognitive decline in the HYVET. *Age and ageing*. 2009; 38(5):521–7. doi: [10.1093/ageing/afp094](https://doi.org/10.1093/ageing/afp094) PMID: [19553357](https://pubmed.ncbi.nlm.nih.gov/19553357/).
13. Dotson VM, Kitner-Triolo MH, Evans MK, Zonderman AB. Effects of race and socioeconomic status on the relative influence of education and literacy on cognitive functioning. *Journal of the International Neuropsychological Society: JINS*. 2009; 15(4):580–9. doi: [10.1017/S1355617709090821](https://doi.org/10.1017/S1355617709090821) PMID: [19573276](https://pubmed.ncbi.nlm.nih.gov/19573276/); PubMed Central PMCID: [PMC2722437](https://pubmed.ncbi.nlm.nih.gov/PMC2722437/).
14. Ishizaki J, Meguro K, Ambo H, Shimada M, Yamaguchi S, Hayasaka C, et al. A normative, community-based study of Mini-Mental State in elderly adults: the effect of age and educational level. *The journals of gerontology Series B, Psychological sciences and social sciences*. 1998; 53(6):P359–63. PMID: [9826967](https://pubmed.ncbi.nlm.nih.gov/9826967/).
15. Wu MS, Lan TH, Chen CM, Chiu HC, Lan TY. Socio-demographic and health-related factors associated with cognitive impairment in the elderly in Taiwan. *BMC public health*. 2011; 11:22. doi: [10.1186/1471-2458-11-22](https://doi.org/10.1186/1471-2458-11-22) PMID: [21223555](https://pubmed.ncbi.nlm.nih.gov/21223555/); PubMed Central PMCID: [PMC3027136](https://pubmed.ncbi.nlm.nih.gov/PMC3027136/).
16. Schmand B, Smit JH, Geerlings MI, Lindeboom J. The effects of intelligence and education on the development of dementia. A test of the brain reserve hypothesis. *Psychological medicine*. 1997; 27(6):1337–44. PMID: [9403905](https://pubmed.ncbi.nlm.nih.gov/9403905/).
17. Beydoun MA, Beydoun HA, Gamaldo AA, Teel A, Zonderman AB, Wang Y. Epidemiologic studies of modifiable factors associated with cognition and dementia: systematic review and meta-analysis. *BMC public health*. 2014; 14:643. doi: [10.1186/1471-2458-14-643](https://doi.org/10.1186/1471-2458-14-643) PMID: [24962204](https://pubmed.ncbi.nlm.nih.gov/24962204/); PubMed Central PMCID: [PMC4099157](https://pubmed.ncbi.nlm.nih.gov/PMC4099157/).
18. Albert MS. How does education affect cognitive function? *Annals of epidemiology*. 1995; 5(1):76–8. PMID: [7728289](https://pubmed.ncbi.nlm.nih.gov/7728289/).
19. Lang IA, Llewellyn DJ, Langa KM, Wallace RB, Huppert FA, Melzer D. Neighborhood deprivation, individual socioeconomic status, and cognitive function in older people: analyses from the English Longitudinal Study of Ageing. *Journal of the American Geriatrics Society*. 2008; 56(2):191–8. doi: [10.1111/j.1532-5415.2007.01557.x](https://doi.org/10.1111/j.1532-5415.2007.01557.x) PMID: [18179489](https://pubmed.ncbi.nlm.nih.gov/18179489/); PubMed Central PMCID: [PMC2671806](https://pubmed.ncbi.nlm.nih.gov/PMC2671806/).
20. Wee LE, Yong YZ, Chng MW, Chew SH, Cheng L, Chua QH, et al. Individual and area-level socioeconomic status and their association with depression amongst community-dwelling elderly in Singapore. *Aging & mental health*. 2014; 18(5):628–41. doi: [10.1080/13607863.2013.866632](https://doi.org/10.1080/13607863.2013.866632) PMID: [24392759](https://pubmed.ncbi.nlm.nih.gov/24392759/).
21. Wight RG, Aneshensel CS, Miller-Martinez D, Botticello AL, Cummings JR, Karlamangla AS, et al. Urban neighborhood context, educational attainment, and cognitive function among older adults. *American journal of epidemiology*. 2006; 163(12):1071–8. doi: [10.1093/aje/kwj176](https://doi.org/10.1093/aje/kwj176) PMID: [16707655](https://pubmed.ncbi.nlm.nih.gov/16707655/).
22. Seeman TE, Lusignolo TM, Albert M, Berkman L. Social relationships, social support, and patterns of cognitive aging in healthy, high-functioning older adults: MacArthur studies of successful aging. *Health psychology: official journal of the Division of Health Psychology, American Psychological Association*. 2001; 20(4):243–55. PMID: [11515736](https://pubmed.ncbi.nlm.nih.gov/11515736/).
23. Weuve J, Kang JH, Manson JE, Breteler MM, Ware JH, Grodstein F. Physical activity, including walking, and cognitive function in older women. *Jama*. 2004; 292(12):1454–61. doi: [10.1001/jama.292.12.1454](https://doi.org/10.1001/jama.292.12.1454) PMID: [15383516](https://pubmed.ncbi.nlm.nih.gov/15383516/).
24. Chen X, Huang Y, Cheng HG. Lower intake of vegetables and legumes associated with cognitive decline among illiterate elderly Chinese: a 3-year cohort study. *The journal of nutrition, health & ageing*. 2012; 16(6):549–52. PMID: [22659995](https://pubmed.ncbi.nlm.nih.gov/22659995/).
25. Bajaj JS, Riggio O, Allampati S, Prakash R, Gioia S, Onori E, et al. Cognitive dysfunction is associated with poor socioeconomic status in patients with cirrhosis: an international multicenter study. *Clinical gastroenterology and hepatology: the official clinical practice journal of the American Gastroenterological Association*. 2013; 11(11):1511–6. doi: [10.1016/j.cgh.2013.05.010](https://doi.org/10.1016/j.cgh.2013.05.010) PMID: [23707462](https://pubmed.ncbi.nlm.nih.gov/23707462/); PubMed Central PMCID: [PMC3808846](https://pubmed.ncbi.nlm.nih.gov/PMC3808846/).
26. Compton DM, Bachman LD, Brand D, Avet TL. Age-associated changes in cognitive function in highly educated adults: emerging myths and realities. *International journal of geriatric psychiatry*. 2000; 15(1):75–85. PMID: [10637408](https://pubmed.ncbi.nlm.nih.gov/10637408/).
27. Wilson RS, Beckett LA, Bennett DA, Albert MS, Evans DA. Change in cognitive function in older persons from a community population: relation to age and Alzheimer disease. *Archives of neurology*. 1999; 56(10):1274–9. PMID: [10520945](https://pubmed.ncbi.nlm.nih.gov/10520945/).
28. Richards M, Sacker A. Lifetime antecedents of cognitive reserve. *Journal of clinical and experimental neuropsychology*. 2003; 25(5):614–24. doi: [10.1076/jcen.25.5.614.14581](https://doi.org/10.1076/jcen.25.5.614.14581) PMID: [12815499](https://pubmed.ncbi.nlm.nih.gov/12815499/).
29. Richard J. Herrnstein CM. *The Bell Curve: Intelligence and Class Structure in American Life* New York: NY: Free Press; 1994.
30. Deary IJ, Johnson W. Intelligence and education: causal perceptions drive analytic processes and therefore conclusions. *International journal of epidemiology*. 2010; 39(5):1362–9. doi: [10.1093/ije/dyq072](https://doi.org/10.1093/ije/dyq072) PMID: [20504860](https://pubmed.ncbi.nlm.nih.gov/20504860/).
